# Supplementary material for: Regulatory NK cells mediated between immunosuppressive monocytes and dysfunctional T cells in chronic HBV infection
Source: PubMed Central journal article supplement — Gut. 2017 Sep 12;67(11):2035–44. doi: 10.1136/gutjnl-2017-314098 (PMC6176520; doi:10.1136/gutjnl-2017-314098), 2017-09-12
Supplement: gutjnl-2017-314098supp001.pdf [file gutjnl-2017-314098supp001.pdf]

Supplementary Table 1. Characteristics of hepatitis B patients and healthy controls

| Clinical data               | Chronic HBV infected patients (n=35) | Healthy controls (n=35) |
|-----------------------------|--------------------------------------|-------------------------|
| Age (years) (Mean $\pm$ SD) | 55 $\pm$ 20                          | 35 $\pm$ 10             |
| Gender(Male/Female)         | 21/14                                | 20/15                   |
| HBeAg (+/-)                 | 35/0                                 | 0/35                    |
| HBeAb (+/-)                 | 0/35                                 | 0/35                    |
| HBsAg ( $\mu$ g/mL)         | 3.86 $\pm$ 1.14                      | —                       |
| ALT (IU/L)                  | 28 $\pm$ 15                          | 30 $\pm$ 12             |
| AST (IU/L)                  | 32 $\pm$ 14                          | 24 $\pm$ 8              |
| HBV DNA level (lg IU/ml)    | 8.6 $\pm$ 1.3                        | —                       |

Abbreviations: ----: not applicable; SEM: standard error of mean

Supplementary Table 2: primers sequences for quantitative real-time PCR

| genes          | Forward primer               | Reverse primer             |
|----------------|------------------------------|----------------------------|
| GAPDH          | CGGATTTGGTCGTATTGGG          | TCTCGCTCCTGGAAGATGG        |
| TNF- $\alpha$  | ATCCTGGGGGACCCAATGTA         | AAAAGAAGGCACAGAGGCCA       |
| IL-10          | GGCACCCAGTCTGAGAACAG         | ACTCTG CTGAAGGCATCTCG      |
| TGF- $\beta$   | GACTACTACGCCAAGGAGGTC        | GAGAGCAACACGGGTGAG         |
| MyD88          | CTGCCTCCTCCTTTCGTTGTAG       | GCTCTGCTGGTCCTTCTTAGTC     |
| NF $\kappa$ B1 | TGGGCTACACCGAAGCAAT          | GGGCTGAGAGGTGGTCTT         |
| TLR2           | ATCCTCCAATCAGGCTTCTCT        | GGACAGGTCAAGGCTTTTTACA     |
| TLR3           | TTGCCTTGTATCTACTTTTGGGG      | TCAACACTGTTATGTTTGTGGGT    |
| iNOS           | GAGGAGCAGGTCGAGGACTAT        | TCTTCGCCTCGTAAGGAAATAC     |
| Arg1           | GTTTCTCAAGCAGACCAGCC         | GCTCAAGTGCAGCAAAGAGA       |
| IDO1           | CAAATCCACGATCATGTGAACC       | AGAACCCTTCATACACCAGAC      |
| IL-12          | AACTTGCAGCTGAAGCCATT         | AGGGTACTCCCAGCTGACCT       |
| T-bet          | GTGACCCAGATGATTGTGCTC        | GTAGGCAGTCACGGCAATG        |
| IL-18          | GTTGCAGAAAGTGTA AAAATT ATTAC | TAA CCT CAT TCA GGA CTT CC |

**A**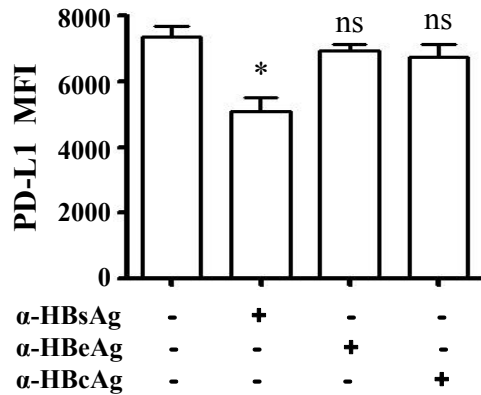**B**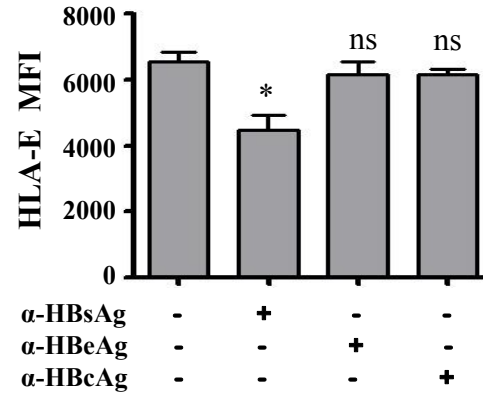**C**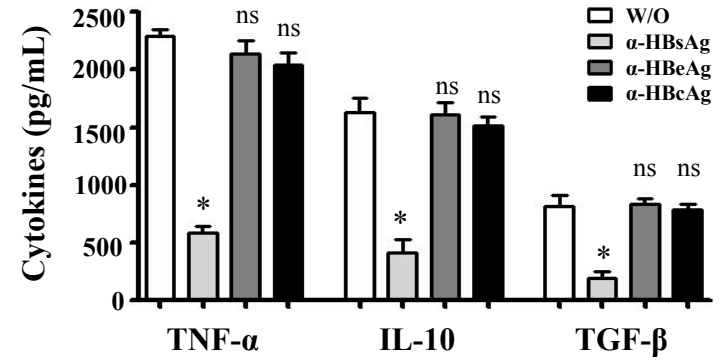

**Supplementary Figure 1: HBV induce immunosuppressive monocytes by employing HBsAg, not HBeAg and HBcAg.** Purified monocytes from healthy donors (n= 5) were stimulated with HBVcc for 24 hours in the presence of HBsAb, HBeAb or HBcAb respectively. HBsAb, but not HBeAb or HBcAb inhibited HBV-induced PD-L1 (A) and HLA-E (B) expression, and cytokines secretion (C). The error bars represent standard error of the mean. \* p<0.05, ns: no significance.

A

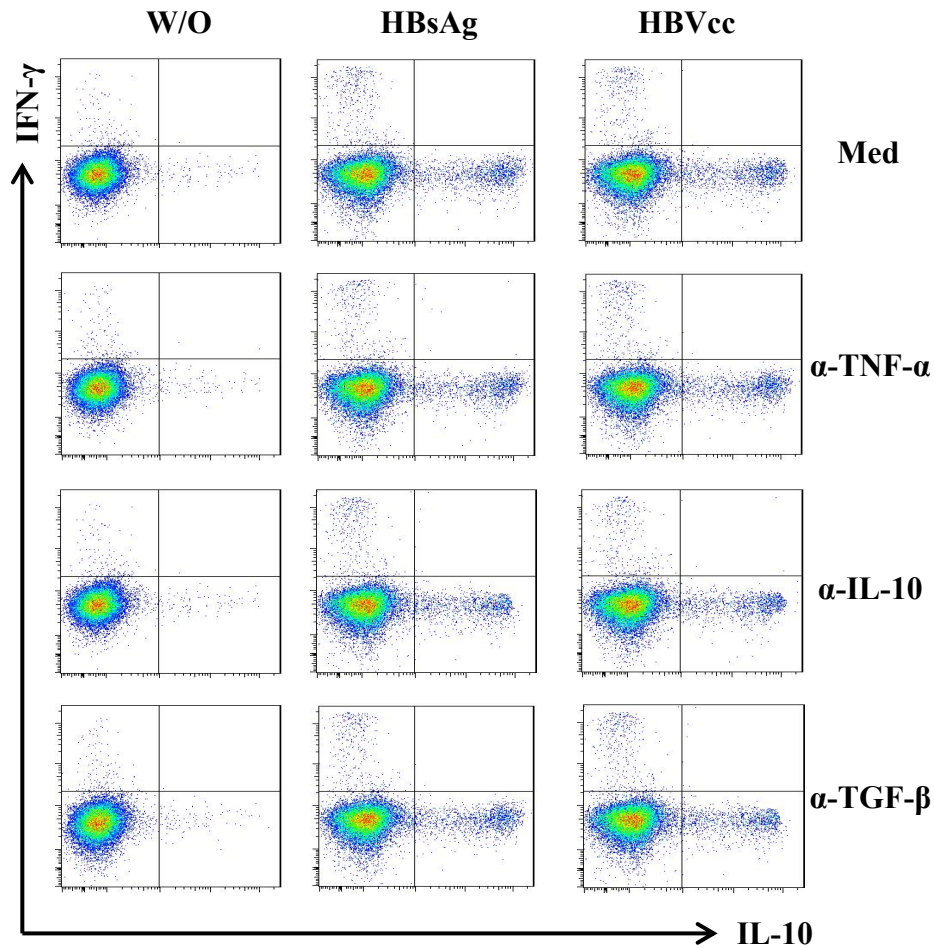

B

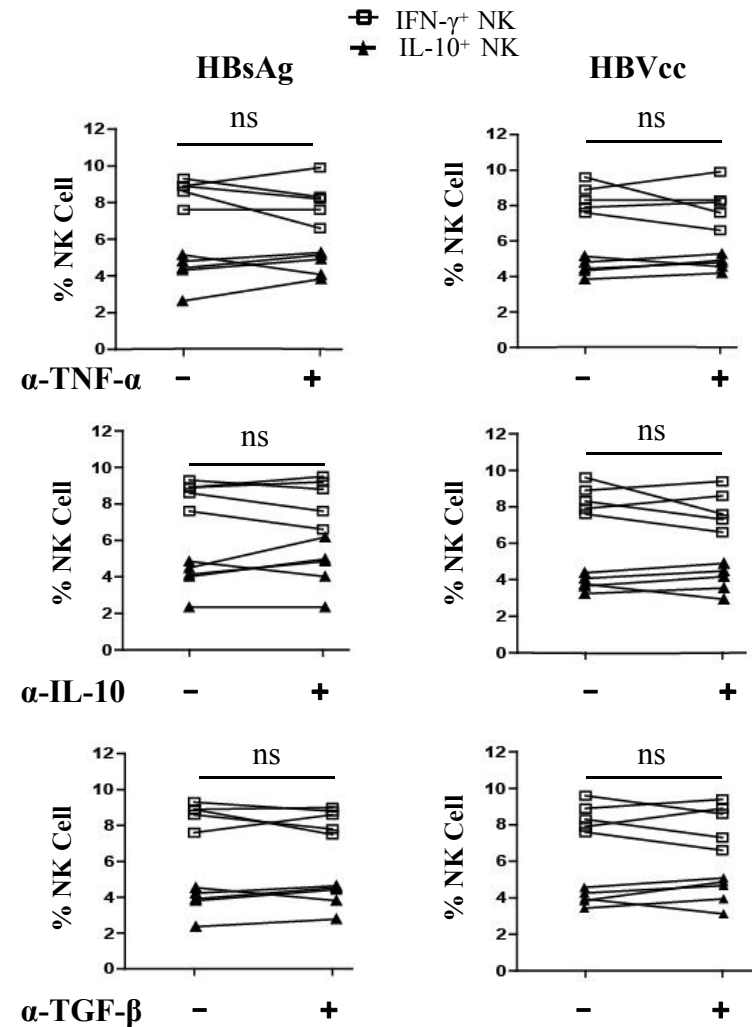

**Supplementary Figure 2: Neutralization of IL-10, TNF- $\alpha$  and TGF- $\beta$  had no significant effect on NK cell activation via HBV-treated monocytes.** Purified monocytes and NK cells were co-cultured for 24 hours with HBsAg (10 $\mu$ g/mL) or HBVcc (10<sup>7</sup>copies/mL) in presence of IL-10, TNF- $\alpha$  and TGF- $\beta$  antibodies. NK cells were identified by CD3 and CD56 staining, and the expression of IL-10 and IFN- $\gamma$  were examined by intracellular cytokine staining. (A) A representative of five independent experiments is shown. (B) Statistical analysis for the expression of IL-10 and IFN- $\gamma$  on NK cells. ns: no significance.
